# Supplementary material
Source: PubMed Central journal article supplement (PMC4068681)
Supplement: AEM.00588-14_zam999105488so1.pdf [file AEM.00588-14_zam999105488so1.pdf]

1 Supplemental material

2

3 A tailored galK counterselection system for efficient markerless gene  
4 deletion and chromosomal tagging in *Magnetospirillum gryphiswaldense*

5

6 Oliver Raschdorf<sup>1,2</sup>, Jürgen M. Plitzko<sup>2,3</sup>, Dirk Schüler<sup>1</sup>, Frank D. Müller<sup>1\*</sup>

7

8 <sup>1</sup>Ludwig Maximilian University Munich, Department Biology I, Biocenter, D-  
9 82152 Planegg-Martinsried, Germany

10 <sup>2</sup>Max Planck Institute of Biochemistry, Department of Molecular Structural  
11 Biology, D-82152 Planegg-Martinsried, Germany

12 <sup>3</sup>Bijvoet Center for Biomolecular Research, Utrecht University, 3584 CH Utrecht, the  
13 Netherlands

14

15 \*Corresponding author: Frank D. Müller, Biozentrum der LMU, Großhaderner  
16 Str. 2-4, 82152 Planegg-Martinsried, Frank.Mueller@biologie.uni-muenchen.de

17

18

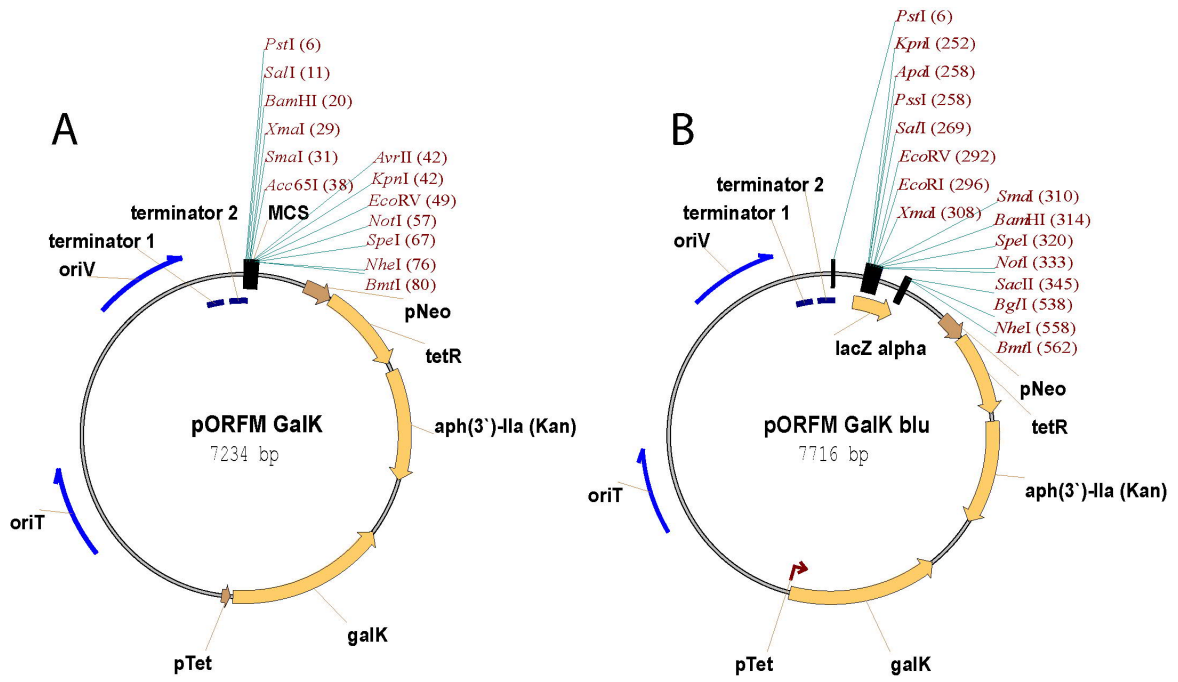

19

20

21 Figure S1. Vector maps of (A) pORFM GalK and (B) pORFM GalK blu. All relevant  
 22 plasmid features are indicated. Unique restrictions sites located in the multiple  
 23 cloning site (MCS) or the lacZ gene fragment, respectively are labelled in red.

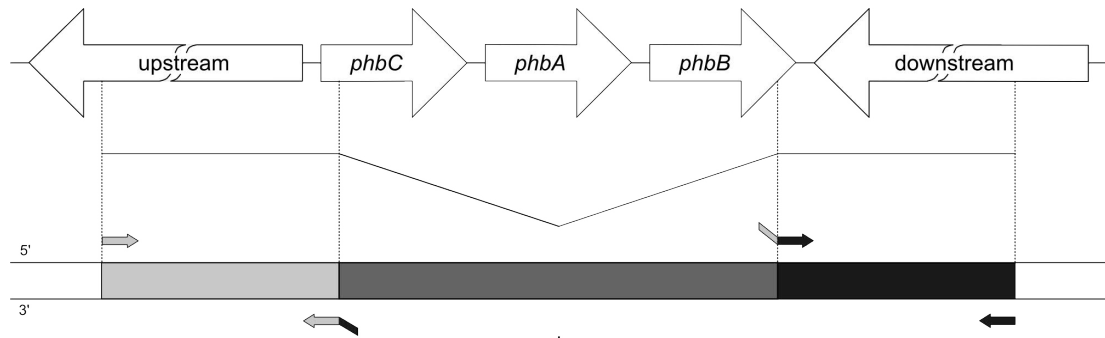

1. amplification

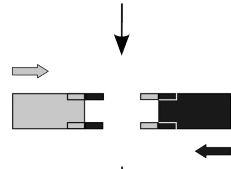

2. fusion

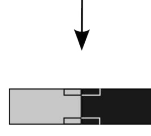

3. ligation

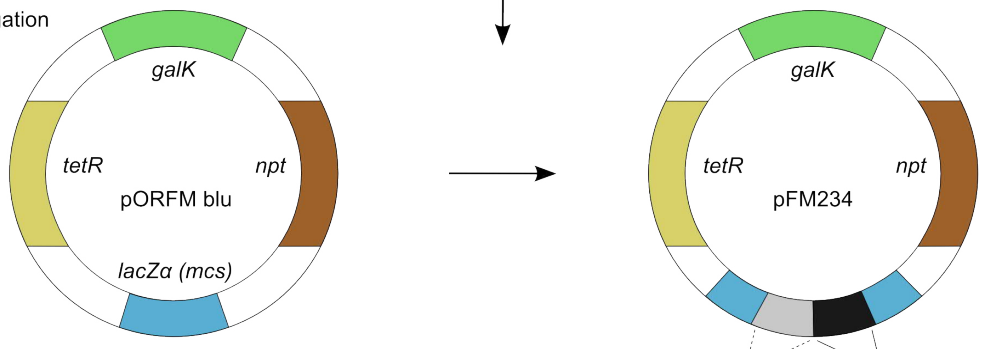

4. conjugation & integration

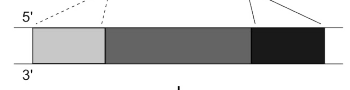

5. "loop out" & counterselection

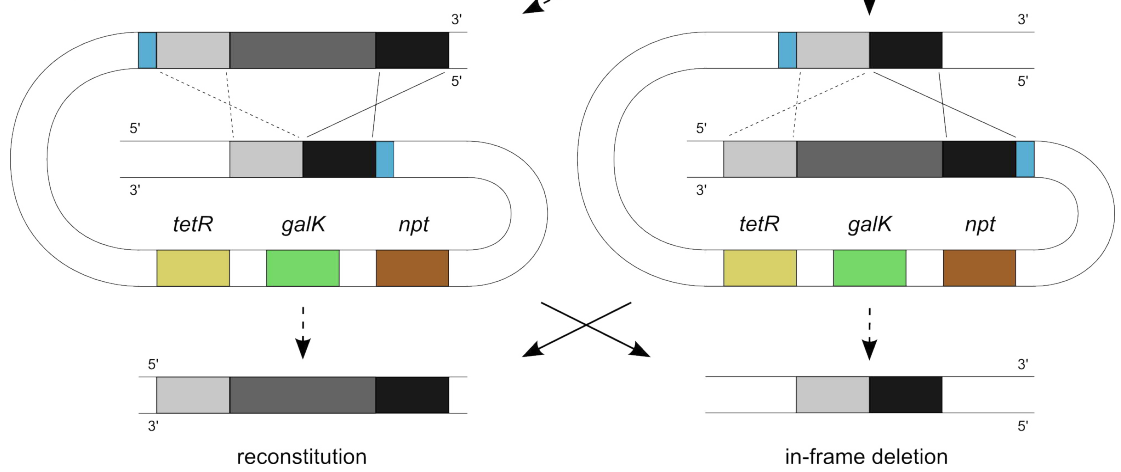

24

25

26

27 Figure S2. Scheme of in-frame gene deletion in MSR-1 with pORFM blu  
28 exemplified by the *phbCAB* operon. First, homologous regions up- and  
29 downstream of the target are amplified by PCR and fused by a second, overlap-  
30 extension PCR. This generates the mutated in-frame allele *in vitro* where the first  
31 and last codons of the target coding region are fused in-frame generating a short  
32 nonsense ORF. The PCR product becomes blunt-end ligated into pORFM blu and  
33 transformed into *E. coli* DH5 $\alpha$ . White, kanamycin resistant clones are selected  
34 and the inserts of their plasmids are sequenced with vector specific primers  
35 oFM280b and oFM281b to verify absence of mutations within the homologous  
36 regions (not shown). Subsequently, the vector is transformed into *E. coli*  
37 BW29427 and conjugated into MSR-1. Recombinant, merodiploid clones are  
38 isolated from kanamycin supplemented FSM plates and screened for up or  
39 downstream integration of the plasmid (step 4, dashed or solid lines,  
40 respectively and illustrated in Figure S2 for the fusion of *mamC* to *egfp* and  
41 *mCherry*). At least one of each integration type is used for counterselection with  
42 galactose which results either in reconstitution of the wt genotype or in-frame  
43 deletion of the target sequence (step 5).

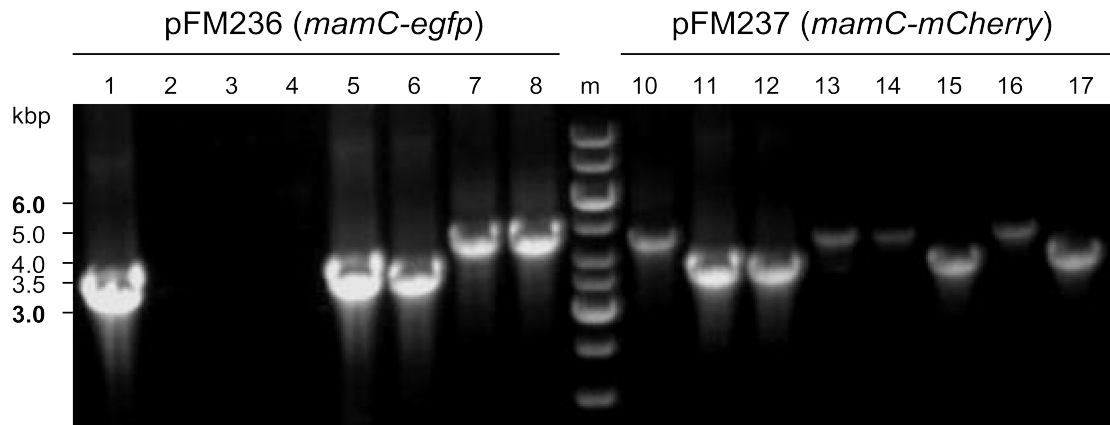

44

45

46 Figure S3. Result of up- or downstream vector insertion diagnosis after pFM236  
 47 (*mamC-egfp*, lanes 1-8) and pFM237 (*mamC-mCherry*, lanes 10-17) conjugation.  
 48 Larger fragments represent vector insertions upstream of *mamC*, smaller  
 49 fragments represent downstream insertions. The size difference of the DNA  
 50 fragments corresponds to *egfp* and *mCherry* (approximately 720 bp)  
 51 respectively. m: DNA size standard (marker). Cells were picked from FSM plates  
 52 with kanamycin and grown in 96-well plates over night prior to colony-PCR with  
 53 oligonucleotide primers oFM281/oFM289a. One strain of each insertion type  
 54 was used for counterselection on galactose plates.

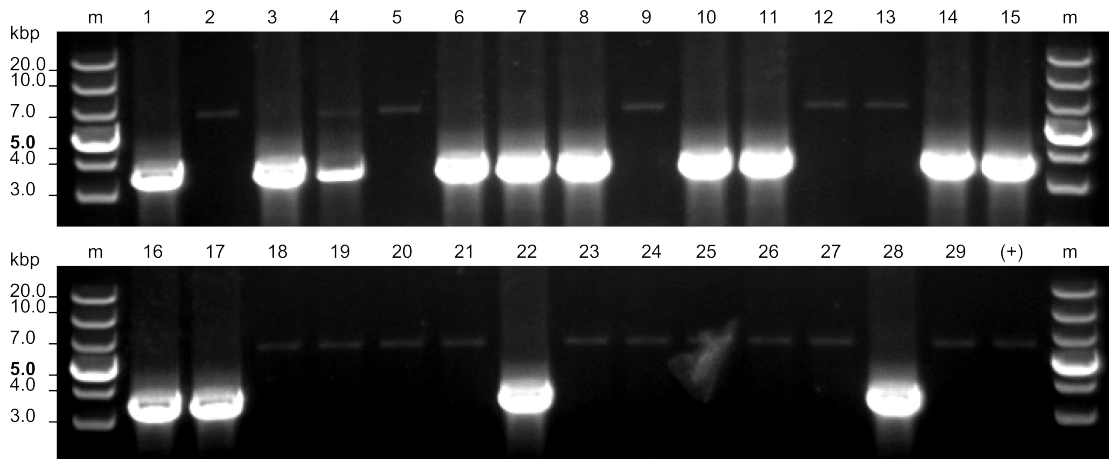

55

56

57 Figure S4. Result of colony-PCR diagnosis for *phbCAB* deletion after galactose  
 58 counterselection. Of the 29 colonies tested, 13 likely contain the deletion (as  
 59 suggest by the lower ~ 3.5 kb band), 15 converted back to wt (~7 kb band) and  
 60 one was inconclusive (lane 4). (+) = wt control, m = DNA size standard (marker).

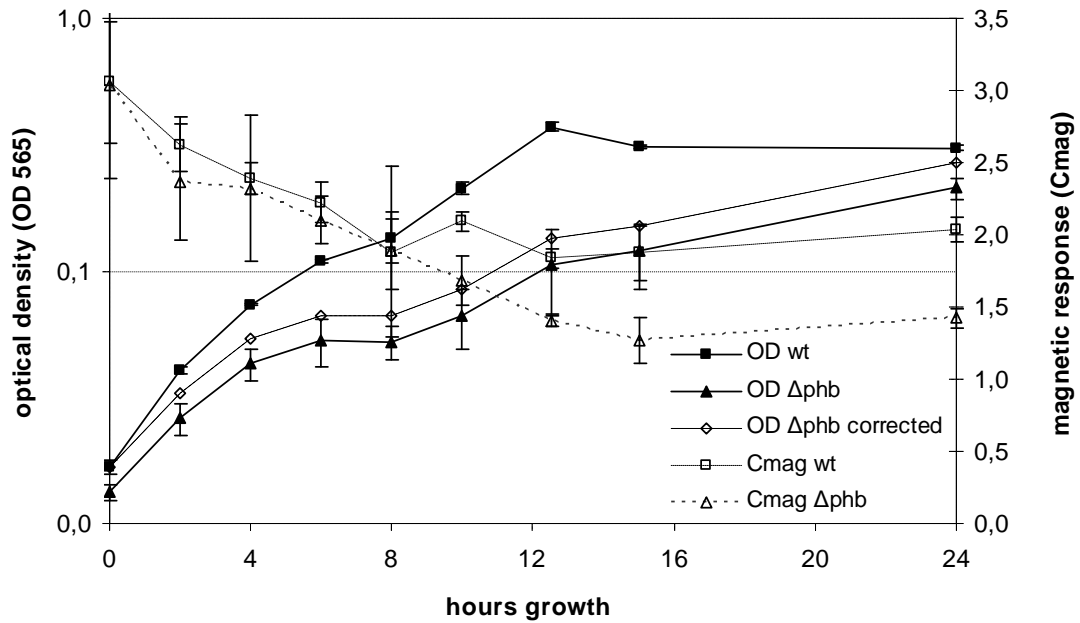

61

62 Figure S5. Growth and magnetic response of  $\Delta$ phbCAB mutant and wt cultures as  
 63 determined by light scattering and cell counts. OD measurements of the  $\Delta$ phbCAB  
 64 mutant (filled triangles) suggest slight growth impairment compared to wt (filled  
 65 squares). Open diamonds: Calculated OD values of the  $\Delta$ phbCAB mutant according  
 66 to the difference in cell counts. 100 ml FSM medium in sealed glass bottles (pre-  
 67 flushed with 2% oxygen and 98% nitrogen as described (R. Uebe et al., J.  
 68 Bacteriol. 192:4192-4204, 2010) were inoculated from over-night cultures to a  
 69 calculated optical density of 0.01 and incubated at 30°C and 120 rpm agitation. 1  
 70 ml samples were withdrawn at the indicated time points and measured  
 71 photometrically for optical density and magnetic response as described in the  
 72 Experimental Procedures section.

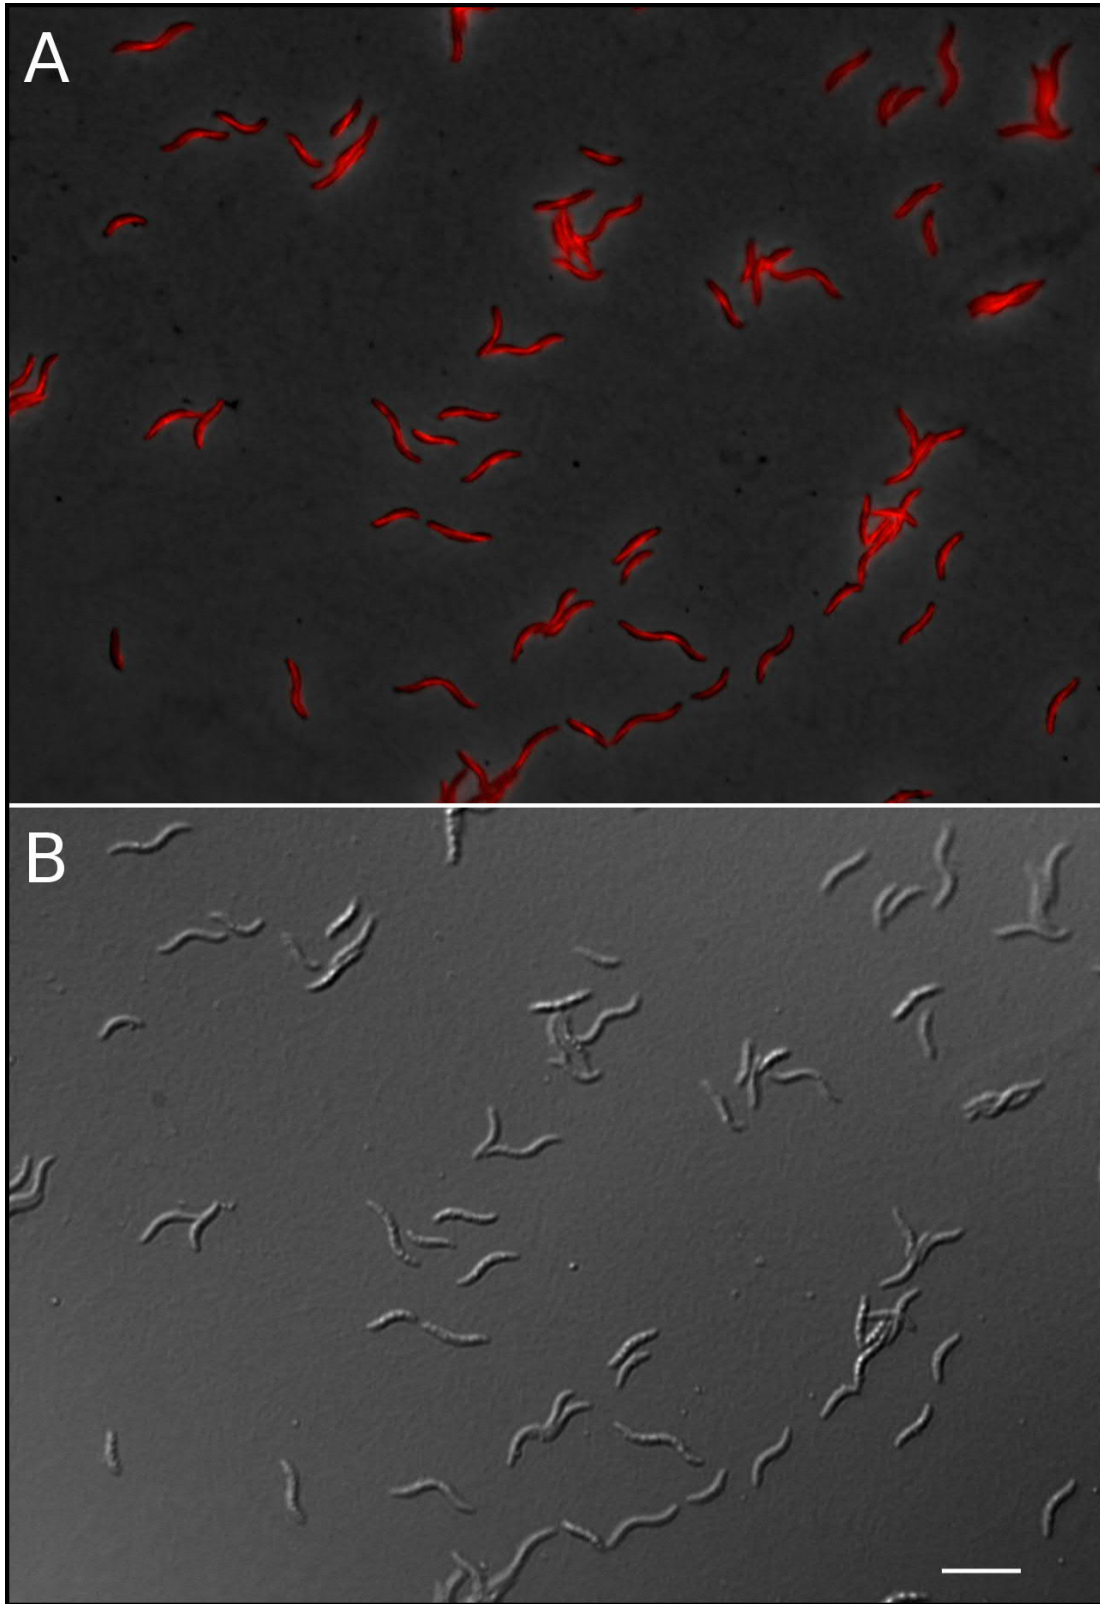

73

74 Figure S6. Chromosomal tagging of the actin-like *mamK* with mCherry results in  
75 a cell population with filamentous pole-to-pole fluorescence signals of uniform  
76 intensity and distribution. (A) Fluorescence and phase contrast overlay image of  
77 strain FM022 (*mcherry-mamK*). (B) DIC image of the same section. Bar: 5  $\mu$ m.



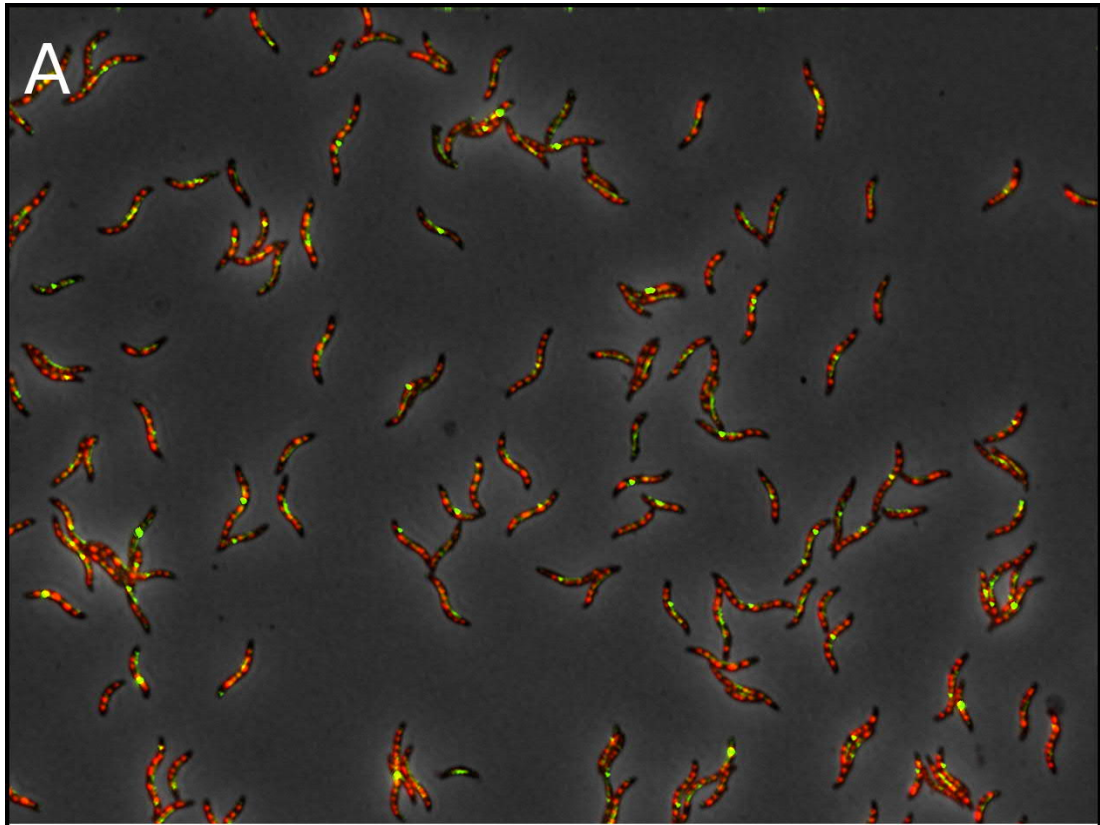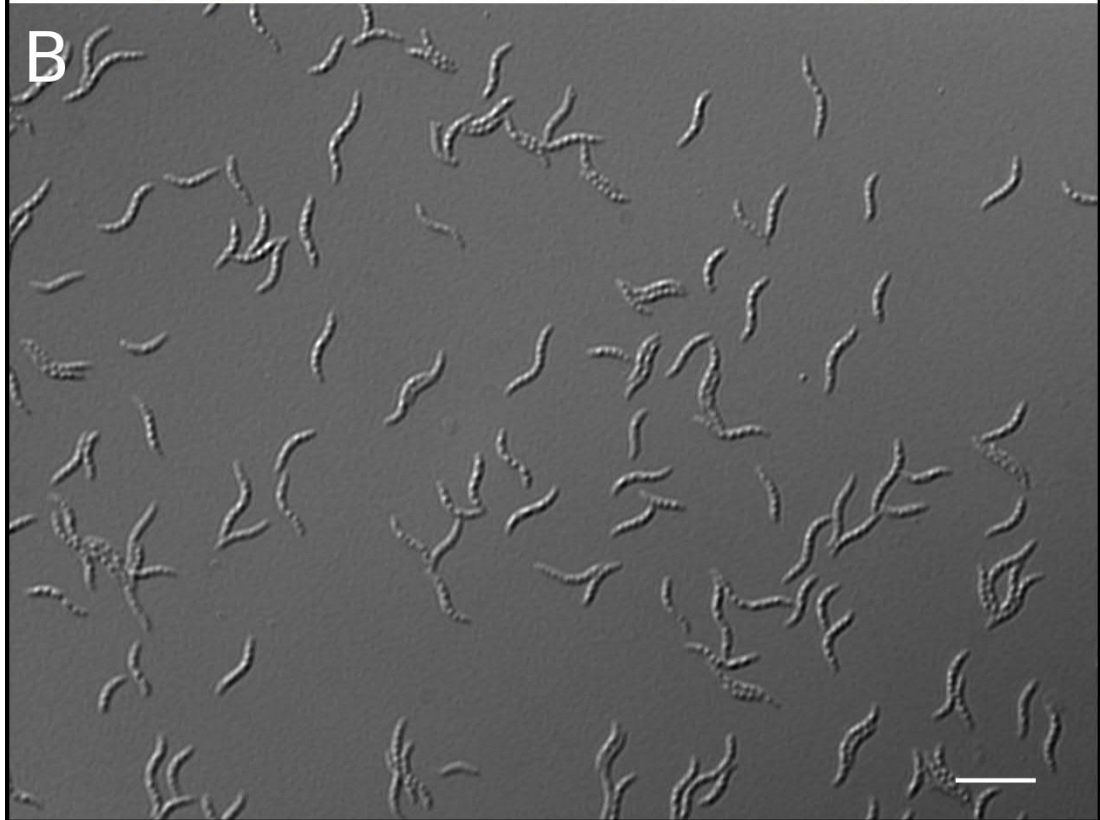

78

79

80 Figure S7. (A) Fluorescence and phase contrast overlay image of strain FM021  
81 harbouring a chromosomally encoded fusion of the magnetosome membrane-  
82 specific MamC protein to EGFP. PHA inclusions were stained with Nile red. (B)  
83 DIC image of the same section. Bar: 5  $\mu$ m.

84

85 **Table S1: DNA oligonucleotides**

| <b>Name</b>                                    | <b>Sequence (5' → 3')<sup>1</sup></b> | <b>Description</b>               |
|------------------------------------------------|---------------------------------------|----------------------------------|
| Primers for pORFM GalK / blu construction      |                                       |                                  |
| oOR059                                         | gatgaagcttggcggattgtcctactcagg        | terminator amplification forward |
| oOR060                                         | gactctgcagactcctgtgatagatccagtaatgac  | terminator amplification reverse |
| oOR063                                         | cgagcatatgagtctgaaagaaaaacacaatctc    | <i>galK</i> forward              |
| oOR077                                         | actggatcccggtcagcactgtcctgctcc        | <i>galK</i> reverse              |
| oOR082                                         | atgagtcgacaattttgtgacactctatcattgatag | $P_{tet}$ - <i>galK</i> forward  |
| oOR083                                         | gttccaattgcggtcagcactgtcctgctcc       | $P_{tet}$ - <i>galK</i> reverse  |
| tetRfwSacl                                     | gcagagctccttccggctggctggtttattg       | <i>tetR</i> forward              |
| tetRrevSacl                                    | gctgagctcctttaagaccactttcac           | <i>tetR</i> reverse              |
| General pORFM screening and sequencing primers |                                       |                                  |
| oFM280a                                        | ctgccactcatcgcagcttagcttg             | pORFM GalK sequencing forward    |
| oFM281                                         | ggctttctacgtgtccgcttccttagc           | pORFM GalK sequencing reverse    |
| oFM280b                                        | aaacagctatgaccatgattacgccaagcg        | pORFM blu sequencing forward     |
| oFM281b                                        | cgcgtaatacgaactcactatagggcg           | pORFM blu sequencing reverse     |
| <i>phbCAB</i> deletion with pORFM blu          |                                       |                                  |
| oFM341                                         | ggccggcgcatcctcgacc                   | upstream fragment forward        |
| oFM342                                         | acggcccacatggcggtaaagggcgacgccg       | upstream fragment reverse        |
| oFM343                                         | taccgccatgtggccgtctgggccg             | downstream fragment forward      |
| oFM344                                         | tggggcgggcccacgtgctgc                 | downstream fragment reverse      |
| oFM207g                                        | gccaggggaatcaccgtaaaagccg             | sequencing (upstream fragment)   |
| oFM207h                                        | gtcccggatgccccatcggc                  | sequencing (upstream fragment)   |

|         |                               |                                  |
|---------|-------------------------------|----------------------------------|
| oFM207i | tcgggcgcggtattcagccgg         | sequencing (downstream fragment) |
| oFM207k | ccatgccccaggccaatgccg         | sequencing (downstream fragment) |
| oFM207l | ctgggtgaagatcttggcgaggaaattgg | verify deletion (upstream)       |
| oFM207m | gccaggatcaaggcttgagtaccg      | verify deletion (downstream)     |

---

*mamC-egfp* and *mamC-mCherry* in-frame fusion with pORFM GalK

---

|         |                                                                                                                |                                        |
|---------|----------------------------------------------------------------------------------------------------------------|----------------------------------------|
| oFM270  | <u>gtcgac</u> ctagctatctgggcatcctctgctcg                                                                       | upstream fragment forward              |
| oFM271  | <u>ggtacc</u> ggccaattctccctcagaatgtctctgctg                                                                   | upstream fragment reverse              |
| oFM272  | <u>ggtacc</u> gaacgttacgcgtcaccggtcggccacctgtg<br>cctgcagggcgag <u>ctcgag</u> gtgagcaagggcgagg<br>agctgttc     | <i>egfp</i> forward                    |
| oFM273  | <u>gaattc</u> tatcactgttacagctcgtccatgccgagag                                                                  | <i>egfp</i> reverse                    |
| oFM274  | <u>gaattc</u> aatattgggctgggtcacggcattcagacacc                                                                 | downstream fragment forward            |
| oFM275  | <u>gctagc</u> cgacgaaggtggtcattttcaatgaccg                                                                     | downstream fragment reverse            |
| oFM276  | <u>ggtacc</u> gaacgttacgcgtcaccggtcggccacctgtg<br>cctgcagggcgag <u>ctcgag</u> gtgagcaagggcgagg<br>aggataacatgg | <i>mCherry</i> forward                 |
| oFM277  | <u>gaattc</u> tctactactgttacagctcgtccatgccgcc                                                                  | <i>mCherry</i> reverse                 |
| oFM278  | atcggcggcatcggaaactggattgc                                                                                     | upstream fragment sequencing forward   |
| oFM278a | ttcgtctcaggaaaggccaataaccatgc                                                                                  | upstream fragment sequencing forward   |
| oFM279  | aatgacctcagggggaatcctctaccg                                                                                    | downstream fragment sequencing reverse |
| oFM279a | ggccttggcctttagatgtacg                                                                                         | downstream fragment sequencing reverse |
| oFM289a | gagcctgctaagcgagggcaaacg                                                                                       | verify fusion (upstream)               |
| oFM290  | cgccattcatgccttgcgatgacg                                                                                       | verify fusion (downstream)             |

---

*mCherry-mamK* in-frame fusion with pORFM GalK

---

|        |                                               |                                                      |
|--------|-----------------------------------------------|------------------------------------------------------|
| oFM369 | <u>gtcgac</u> gggggctcaggccaatgatcttatcatcg   | <i>mamK-mCherry</i> fusion upstream fragment forward |
| oFM370 | <i>cttgctca</i> tttgtcactccgttcgctgctaacagatc | <i>mamK-mCherry</i> fusion                           |

|        |                                                                              |                                                              |
|--------|------------------------------------------------------------------------------|--------------------------------------------------------------|
|        |                                                                              | upstream fragment reverse                                    |
| oFM371 | <i>agtgacaaaatgagcaagggcgaggaggataacat</i><br><i>gg</i>                      | <i>mCherry</i> forward                                       |
| oFM372 | <u>ggatcc</u> gcgccgccgaattctccggagctcgagatct<br>taaggtagcctgtacagctcgatgccg | <i>mCherry</i> reverse                                       |
| oFM373 | <u>ggatcctatgagtgaaggtgaaggccaggccaag</u>                                    | <i>mCherry-mamK</i> fusion<br>downstream fragment<br>forward |
| oFM374 | <u>actagtgaacgccttcacccatgagcacgg</u>                                        | <i>mCherry-mamK</i> fusion<br>downstream fragment<br>reverse |
| oFM375 | atgtccagccgaaacggatgccg                                                      | upstream fragment<br>sequencing                              |
| oFM376 | ggctatggcttgacaagctgaacaatacc                                                | downstream fragment<br>sequencing                            |
| oFM377 | ctgggatggagatcgagacttttatggc                                                 | verify fusion (upstream)                                     |
| oFM378 | ccaataatcaccatcaggcggttcagc                                                  | verify fusion (downstream)                                   |

86

87 <sup>1</sup>Reverse complementary sequences are *italicised*, restriction sites are underlined.

88

89
